# Associations between aversive learning processes and transdiagnostic psychiatric symptoms revealed by large-scale phenotyping

Toby Wise<sup>1,2,3</sup> & Raymond J Dolan<sup>1,2</sup>

<sup>1</sup>Wellcome Centre for Human Neuroimaging, University College London, London, UK

<sup>2</sup>Max Planck UCL Centre for Computational Psychiatry and Ageing Research, University College London, London, UK

<sup>3</sup>Division of the Humanities and Social Sciences, California Institute of Technology, Pasadena, CA, USA

## Abstract

### Background

Aversive learning processes are a candidate source of dysfunction in psychiatric disorders. Here symptom expression in a range of conditions is linked to altered threat perception, manifesting particularly in uncertain environments. How precise computational mechanisms that support aversive learning, and uncertainty estimation, relate to the presence of specific psychiatric symptoms remains undetermined.

### Methods

400 subjects completed a novel online game-based aversive learning task, requiring avoidance of negative outcomes, in conjunction with completing measures of common psychiatric symptoms. We used a probabilistic computational model to measure distinct processes involved in learning, in addition to inferred estimates of safety likelihood and uncertainty. We tested for associations between learning processes and traditional psychiatric constructs alongside transdiagnostic factors using linear models. We used partial least squares regression to identify components of psychopathology grounded in both aversive learning behaviour and symptom self-report.

### Results

State anxiety and a transdiagnostic compulsivity-related factor were associated with enhanced learning from safety. However, data-driven analysis using partial least squares regression indicated the presence of two separable components across our behavioural and questionnaire data: one linked enhanced safety learning and lower estimated uncertainty to physiological anxiety, compulsivity, and impulsivity; the other linked enhanced threat learning and heightened uncertainty estimation to symptoms of depression and social anxiety.

### Conclusions

Our findings implicate aversive learning processes under uncertainty to the expression of psychiatric symptoms that cut across traditional diagnostic boundaries. These relationships are more complex than previously conceptualised. Future research should focus on understanding the neural mechanisms underlying alterations in aversive learning and how these lead to the development of symptoms and disorder.

## 37 Introduction

38 Many core symptoms of mental illness are linked to learning about unpleasant events in our  
39 environment. In particular, symptoms of mood and anxiety disorders, such as apprehension,  
40 worry, and low mood can intuitively be related to altered perception of the likelihood of aversive  
41 outcomes. Indeed, the importance of altered threat perception is a feature of many disorders  
42 that extend beyond disorders of mood to encompass conditions such as psychosis (1) and  
43 eating disorders (2). As a result, research into how individuals learn about aversive events  
44 holds great promise for enhancing our understanding across a diverse range of mental health  
45 problems.

46 Computational approaches are a powerful means to characterise the precise mechanisms  
47 underpinning learning, as well as uncovering how these relate to psychiatric symptom  
48 expression (3, 4). Recent studies have leveraged computational modelling to describe  
49 associations between learning processes and psychiatrically-relevant traits in non-clinical  
50 samples (5–8), as well as in clinical conditions ranging from anxiety and depression to  
51 psychosis (9–12). A common finding across studies is that of altered learning rates, where  
52 psychopathology is linked to inappropriate weighting of evidence when updating value  
53 estimates (13, 14). Notably, there is evidence suggesting that people with clinically significant  
54 symptoms of anxiety and depression show biased learning as a function of the valence of  
55 information, updating faster in response to negative than positive outcomes (12), a bias that  
56 might engender a negative view of the environment. In healthy individuals, this bias is  
57 associated with trait optimism (15). However, it is unclear to extent such biased learning relates  
58 to the spectrum of mental health problems.

59 One process implicated in the genesis of psychiatric disorders is that of uncertainty estimation.  
60 Uncertainty plays a fundamental role in learning, and computational formulations optimise  
61 learning in the face of non-stationary probabilistic outcomes based on uncertainty (11, 16–19).  
62 While psychiatric traits, including anxiety, are linked to an inability to adapt learning in response  
63 to environmental statistics such as volatility (5, 9), little research has investigated whether how  
64 individuals estimate, or respond to, uncertainty in aversive environments is associated with  
65 psychiatric traits. This is a critical question given that core features of anxiety revolve around a  
66 concept of uncertainty; individuals with anxiety disorders report feeling more uncertain about  
67 threat and being less comfortable in situations involving uncertainty (20–23).

68 Existing work on aversive learning has had a particular focus on symptoms of anxiety and  
69 depression (7, 12). However, these approaches have not been designed optimally for  
70 identifying mechanisms that span traditional diagnostic boundaries. This assumes importance  
71 in light of recent studies, using large samples, that show several aspects of learning and  
72 decision making relate more strongly to transdiagnostic factors than to any specific categorical  
73 psychiatric disorder (6, 8, 24, 25). Applying such an approach to aversive learning may yield  
74 better insights into the role of learning in psychiatric disorders.

75 Here, we aimed to identify specific aversive learning processes that relate to both traditional  
76 measures of anxiety, and transdiagnostic psychiatric traits, in a large sample collected online.

77 Specifically, we used a computational approach to test whether anxiety and transdiagnostic  
78 symptoms are associated with biased learning from safety and threat, whether these traits  
79 relate to altered estimates of threat likelihood, and whether they are associated with different  
80 levels of uncertainty during threat learning. Given difficulties in using traditional aversive stimuli  
81 in an online setting, we developed a novel game-based avoidance task designed to engage  
82 threat and avoidance processes without the need for administration of painful or noxious  
83 stimuli.

## 84 Methods and materials

### 85 Ethics

86 This research was approved by the University College London research ethics committee  
87 (reference 9929/003). All participants provided informed consent and were compensated  
88 financially for their time at a rate of at least £6 per hour.

### 89 Participants

90 We recruited 400 participants through Prolific (26). Subjects were selected based on being  
91 aged 18-65 and having at least a 90% approval rate across studies they had previously  
92 participated in.

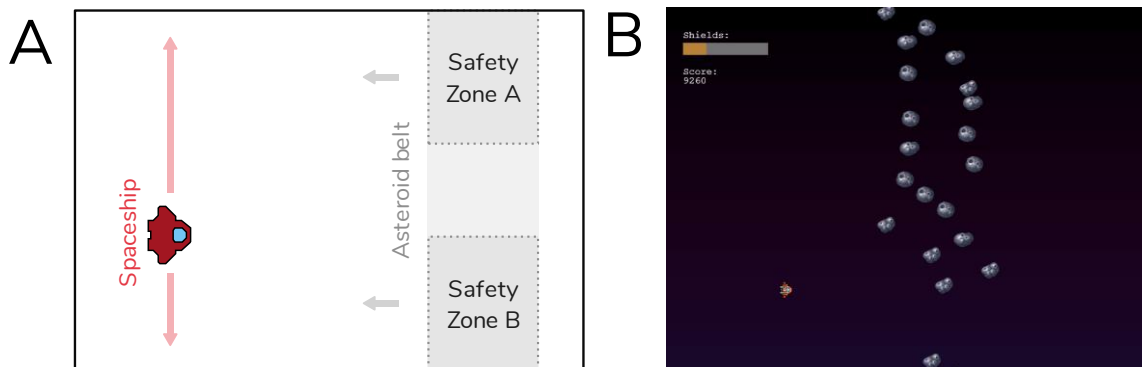

93

94 Figure 1. A) Task design. Subjects were tasked with playing a game that had a cover story involving flying a  
95 spaceship through asteroid belts. Each asteroid belt featured two locations that could potentially contain escape  
96 holes (safety zones), and subjects were instructed to aim to fly their spaceship through these to gain the highest  
97 number of points. Subjects were only able to move the spaceship in the Y-dimension, while asteroid belts moved  
98 towards the spaceship. The probability of each zone being safe varied over the course of the task but this could be  
99 learned, and learning this probability facilitated performance. B) Screenshot of the task, showing the spaceship, an  
100 asteroid belt with a hole in the lower safety zone (safety zone B), a representation of the spaceship's integrity (shown  
101 by the coloured bar in the top left corner) and the current score.

### 102 Avoidance learning task

103 Traditional lab-based threat learning tasks typically use aversive stimuli such as electric shocks  
104 as outcomes to be avoided. As it is not possible to use these stimuli online, we developed a  
105 game-based task in which subjects' goal was to avoid negative outcomes. In this game,  
106 participants were tasked with flying a spaceship through asteroid belts. Subjects were able to  
107 move the spaceship in the Y-axis alone, and this resulted in a one dimensional behavioural

108 output. Crashing into asteroids diminished the spaceship's integrity, and if enough asteroids  
109 were hit the game finished. In this eventuality subjects were able to restart and continue where  
110 they left off. The overarching goal was to maximise the number of points scored, where the  
111 latter accumulated continuously for as long as the game was ongoing, and reset if the  
112 spaceship was destroyed. Subjects were shown the current integrity of the spaceship by a bar  
113 displayed in the corner of the screen, along with by a display of their current score. No actual  
114 monetary reward was given to the subjects for performance on the task.

115 Crucially, the location of safe spaces in the asteroid belts could be learned, and learning  
116 facilitated performance as it allowed correct positioning of the spaceship prior to observing the  
117 safe location. The task was designed such that without such pre-emptive positioning it was  
118 near impossible to successfully avoid the asteroids, thus encouraging subjects to learn the  
119 safest positions. Holes in the asteroids could appear either at the top or bottom of the screen  
120 (Figure 1A), and the probability of safety associated with either location varied independently  
121 over the course of the task. Thus, it was possible to learn the safety probability associated with  
122 each safety zone and adapt one's behaviour accordingly. Participants also completed a control  
123 task that required avoidance that was not dependent on learning, enabling us to control for  
124 general motor-related avoidance ability in further analyses (described in supplementary  
125 material). We elected a priori to exclude subjects with limited response variability (indicated by  
126 a standard deviation of their positions below 0.05) so as to remove subjects who did not move  
127 the spaceship. However, no subject met this exclusion criterion.

128 After completing the task, subjects were asked to provide ratings indicating how anxious the  
129 task made them feel and how motivated they were to avoid the asteroids, using visual analogue  
130 scales ranging from 0 to 100.

### 131 Behavioural data extraction

132 For analysis, we treated each pass through an asteroid belt as a trial. Overall there were 269  
133 trials in total. As a measure of behaviour, we extracted the mean Y position across the 1 second  
134 prior to observing the asteroid belt, representing where subjects were positioning themselves  
135 in preparation for the upcoming asteroid belt.

### 136 Computational modelling of behaviour

137 Our modelling approach focused on models that allowed the quantification of subjective  
138 uncertainty. To this end, we modelled behaviour using approximate Bayesian models that  
139 assume subjects estimate safety probability using a beta distribution. This approach is naturally  
140 suited to probability estimation tasks, as the beta distribution is bounded between zero and  
141 one, and provides a measure of uncertainty through the variance of the distribution. While  
142 certain reinforcement learning formulations can achieve similar uncertainty-dependent learning  
143 and quantification of uncertainty, we chose beta models as they have an advantage of being  
144 computationally simple. Empirically, these models have been used successfully in previous  
145 studies to capture value-based learning (27), where they explain behaviour in aversive learning  
146 tasks better than commonly used reinforcement learning models (28, 29), a pertinent  
147 characteristic in the current task.

148 The basic premise underlying these models is that evidence for a given outcome is dependent  
149 on the number of times this outcome has occurred previously. For example, evidence for safety  
150 in a given location should then be highest when safety has been encountered many times in  
151 this location. This count can be represented by a parameter  $A$ , which is then incremented by a  
152 given amount every time safety is encountered. Danger is represented by a complementary  
153 parameter  $B$ . The balance between these parameters provides an indication of which outcome  
154 is most likely. Meanwhile, the overall number of outcomes counted influences the variance of  
155 the distribution and hence the uncertainty about this estimate. Thus, uncertainty is highest  
156 when few outcomes have been observed. The exact amount by which  $A$  and  $B$  are updated  
157 after every observed outcome can be estimated as a free parameter (here termed  $\tau$ ), and we  
158 can build asymmetry in learning into the model, so that learning about safety and danger have  
159 different rates, allowing updates for  $A$  and  $B$  to take on different values (here termed  $\tau^+$  and  $\tau^-$   
160 ).

161 Such a model is appropriate in stationary environments, when the probability of a given  
162 outcome is assumed to be constant throughout the experiment. However, in our task the  
163 probability of safety varied, and so it was necessary to build a forgetting process into the model.  
164 This is achieved by incorporating a decay (represented by parameter  $\lambda$ ) which diminishes the  
165 current values of  $A$  and  $B$  on every trial. The result of this process is akin to reducing the number  
166 of times they have been observed, and maintains the model's ability to update in response to  
167 incoming evidence. Estimates for  $A$  and  $B$  are therefore updated on each trial ( $t$ ) according to  
168 the following equation for both shock zones independently (termed  $X$  and  $Y$  here). Both zones  
169 are updated on every trial, as subjects saw the outcome associated with both simultaneously.  
170 This formed the basis of all the probabilistic models tested:

$$171 \quad A_{t+1}^X = (1 - \lambda) \cdot A_t^X + \text{outcome}_t^X \cdot \tau^+ \cdot W \quad (1)$$

$$172 \quad B_{t+1}^X = (1 - \lambda) \cdot B_t^X + (1 - \text{outcome}_t^X) \cdot \tau^- \cdot W \quad (2)$$

173 We also observed in pilot data that subjects tended to be influenced more by outcomes  
174 occurring in the zone they had previously chosen, an effect likely due to attention. On this basis,  
175 we incorporated a weighting parameter that allowed the outcome of the unchosen option to  
176 be down-weighted by an amount shown in the above equation ( $W$ ) determined by an  
177 additional free parameter,  $\omega$ .

$$178 \quad W_{t+1}^X = \begin{cases} 1 & \text{if chosen} \\ \omega & \text{if unchosen} \end{cases} \quad (3)$$

179 We can calculate the estimated safety probability for each zone ( $P$ ) by taking the mean of this  
180 distribution:

$$181 \quad P_{t+1}^X = \frac{A_{t+1}^X}{(A_{t+1}^X + B_{t+1}^X)} \quad (4)$$

182 Similarly, we can derive a measure of uncertainty on each trial by taking the variance of this  
183 distribution.

184 
$$\sigma_{t+1}^X = \frac{A_{t+1}^X \cdot B_{t+1}^X}{(A_{t+1}^X + B_{t+1}^X)^2 \cdot (A_{t+1}^X + B_{t+1}^X + 1)} \quad (5)$$

185 Our best fitting model included a “stickiness” parameter, which caused the chosen safety zone  
186 to be more likely to be chosen on the following trial (other models tested and compared with  
187 the winning model are described fully in supplementary material). This was achieved by  
188 boosting the value of the chosen option (determined by whether the position was above or  
189 below the centre) by raising the estimated safety probability of the option to the power of S, a  
190 free parameter bounded between zero and one governing the degree of stickiness. Here an  
191 exponential effect was chosen over an additive one as it ensures the probability does not take  
192 a value above 1.

193 
$$P_{t+1}^X = \begin{cases} P_{t+1}^X{}^S & \text{if chosen} \\ P_{t+1}^X & \text{if unchosen} \end{cases} \quad (6)$$

194 In order to fit our model to the observed behaviour, we require an output that represents the  
195 position of the spaceship on the screen. This position (pos) was calculated based on the safety  
196 probability of the two safety zones, such that the position was biased towards the safest  
197 location and was nearer the centre of the screen when it was unclear which position was safest.

198 
$$pos_{t+1} = \frac{(P_{t+1}^X - P_{t+1}^Y) + 1}{2} \quad (7)$$

199 Additionally, based on pilot data we had noted that subjects tended to position themselves  
200 nearer to either the top or bottom of the screen, and tended to avoid the centre. To encourage  
201 similar performance from our model, a softmax function with inverse temperature ( $\beta$ ) as a free  
202 parameter was applied to the estimated position:

203 
$$pos_{t+1} = \frac{e^{(\beta \cdot pos_{t+1})}}{e^{(\beta \cdot pos_{t+1})} + e^{(\beta \cdot (1 - pos_{t+1}))}} \quad (8)$$

204 Although softmax functions are typically used for converting continuous value estimates to  
205 choice probabilities in decision making tasks, we emphasise that here this method is used  
206 simply to produce position estimates that avoid the centre of the screen rather than the  
207 conventional usage of computing choice probability.

208 For completeness, we also tested two reinforcement learning models, a Rescorla-Wagner  
209 model and a variant of this model with different learning rates for better and worse than  
210 expected outcomes (15), both of which are described in supplementary material.

211 Models were fit with a hierarchical Bayesian approach using variational inference implemented  
212 in PyMC3, through maximising the likelihood of the data given a reparametrised beta  
213 distribution with a mean provided by the model and a single free variance parameter. Model fit  
214 was assessed using the Watanabe-Akaike Information Criterion (WAIC)(30), an index of model  
215 fit designed for Bayesian models that accounts for model complexity.

## 216 Measures of psychiatric traits

217 Our primary hypotheses focused on state/trait anxiety and intolerance of uncertainty. These  
218 were measured using the State Trait Inventory of Cognitive and Somatic Anxiety (STICSA)(31)  
219 and the Intolerance of Uncertainty Scale (IUS)(32) respectively. We also wished to examine  
220 how behaviour in our task related to the three transdiagnostic factors identified by Gillan et al.  
221 (2016), based on factor analysis of a range of psychiatric measures. To measure these factors  
222 more efficiently, we developed a reduced set of questions that provided an accurate  
223 approximation of the true factor scores, details of which are provided in supplementary  
224 material.

## 225 Regression models

226 Bayesian regression models were used to investigate relationships between behaviour and  
227 psychiatric measures, predicting each behavioural measure of interest from the psychiatric  
228 measures. Our dependent variables were parameters and quantities derived from our model,  
229 which represented the way in which an individual learns about safety probability and how they  
230 estimate uncertainty. Specifically, we used the two update parameters from our model ( $\tau^+$  and  
231  $\tau^-$ , referring to the extent to which subjects update in response to safety and danger  
232 respectively) and the mean safety probability and uncertainty estimates across the task  
233 (generated by simulating data from the model with each subject's estimated parameter values).  
234 Crucially, the fact that task outcomes were identical for every subject ensured these values  
235 were dependent only on the manner by which subjects learned about safety, not the task itself.

236 These models were constructed using Bambi (33) and fit using Markov chain Monte Carlo  
237 (MCMC) sampling, each with 8000 samples, 2000 of which were used for tuning. All models  
238 included age and sex as covariates, along with performance on our control task to account for  
239 non-learning related avoidance ability. For analyses predicting state and trait anxiety and  
240 intolerance of uncertainty, we constructed a separate model for each variable due to the high  
241 collinearity between these measures. For analyses including the three transdiagnostic factors,  
242 these were entered into a single model. When reporting regression coefficients, we report the  
243 mean of the posterior distribution along with the 95% highest posterior density interval (HPDI),  
244 representing the points between which 95% of the posterior distribution's density lies.

## 245 Partial least squares regression

246 To provide a data-driven characterisation of the relationship between task behaviour and  
247 psychiatric traits, and take advantage of item-level responses in our questionnaire measures,  
248 we used partial least squares (PLS) regression to identify dimensions of covariance between  
249 individual questions and the measures derived from our modelling. To ensure robustness of  
250 these results, we split our data into training and testing sets, made up of 75% and 25% of the  
251 data respectively. To identify the appropriate number of components within the training set,  
252 we used a 10-fold cross-validation procedure. The mean squared error of the model's  
253 predictions was then averaged across test folds to provide an index of the model's predictive  
254 accuracy with different numbers of components.

255 Once the number of components was determined, we validated the model's predictions by  
256 testing its predictive accuracy on the held-out 25% of the data. To provide a measure of  
257 statistical significance we used permutation testing, repeating this process 1000 times with  
258 shuffled outcome variables to assess its predictive accuracy when fitted on data where no  
259 relationship exists between the predictors and outcomes.

## 260 Preregistration

261 The main hypotheses and methods of this study were preregistered on the Open Science  
262 Framework (<https://osf.io/jp5qn>). The data-driven PLS regression analysis was exploratory.

## 263 Results

### 264 Task performance

265 Subjects engaged and performed well at the task, on average hitting enough 'asteroids' to  
266 destroy the spaceship 1.92 times (SD= 1.95) over the course of the task. To provide a simple  
267 behavioural measure of subjects' avoidance tendencies, we calculated the degree to which  
268 they moved their position following safe and dangerous outcomes at their chosen location. As  
269 expected, this revealed subjects tended to shift their position more following danger than  
270 following safety outcomes, indicating they adapted their behaviour in the task, and learnt about  
271 the safest locations (Figure 2A).

272 Subjects reported high motivation to perform the task, providing a mean rating of 85.70 (SD =  
273 18.44) when asked to rate how motivated they were to avoid asteroids on a scale from 0-100  
274 (Figure 3B). When asked to rate how anxious the task made them feel on a similar scale,  
275 subjects provided an average rating of 40.89 (SD = 30.45), although visual inspection of their  
276 responses indicated a strongly bimodal distribution (Figure 3A).

### 277 Computational modelling of behaviour

278 To quantitatively describe behaviour, we fit a series of computational models to the behavioural  
279 data. Probabilistic models tended to outperform reinforcement learning models according to  
280 WAIC scores that penalise based on model complexity (Figure 2B), with the winning model  
281 being an asymmetric leaky beta model incorporating choice stickiness. Simulating responses  
282 using the model, using each subject's estimated parameter values, produced profiles that  
283 demonstrated a high concordance with the true data, reproducing broad behavioural patterns  
284 seen in the true data (Figure S1).

285 Due to an interest in asymmetric learning about safety and punishment, the two parameters of  
286 the preferred model with greatest relevance to our hypotheses were update rates for safety  
287 and danger. To verify that the estimated parameters truly reflected behavioural tendencies, we  
288 examined correlations between their estimated values and the tendency to stay following  
289 safety and move following danger across subjects (Figure 2D). These were robustly correlated,  
290 providing confidence that these model-derived parameters related to relevant behavioural  
291 measures. Interestingly, we observed a negative bias in the values of these parameters  
292 whereby subjects tended to update to a greater extent in response to danger than safety  
293 ( $t(400) = 26.76, p < .001$ , Figure 2E).



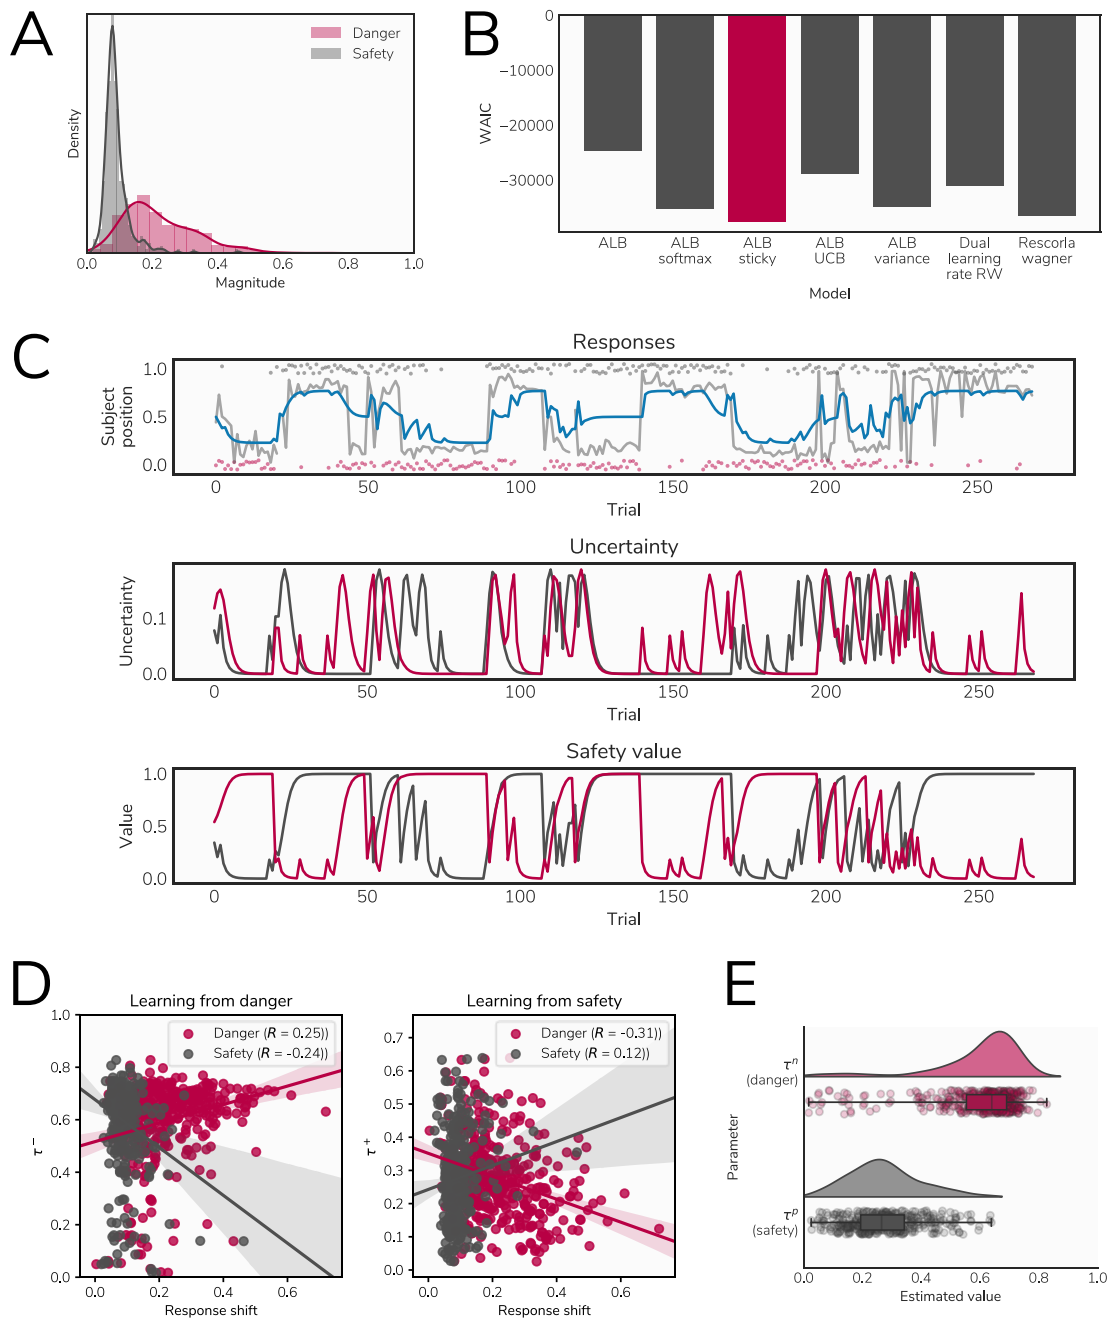

294

295

296

297

298

299

300

301

302

303

304

305

306

Figure 2. A) Degree of location switching after encountering danger and safety across subjects. The switch magnitude is the average absolute change in position between trial  $n$  and trial  $n+1$ . As expected, subjects showed more switching behaviour after encountering danger and were more likely to stay in the same position following a safe outcome. B) Model comparison results, showing the WAIC score for each model with the winning model highlighted. ALB = asymmetric leaky beta, RW = Rescorla-Wagner. C) The top panel shows responses and model fit for an example subject. In the top panel, the grey line represents the subject's position throughout the task, with the grey and red dots representing safe locations on each trial. The blue line represents simulated data from the model for this subject. The lower two panels show estimated uncertainty and safety probability for each stimulus (represented by the grey and red lines) across the duration of the task, generated by simulating data from the model. D) Correlations between estimated update parameters for danger (left) and safety (right) and our behavioural measure of position switching after these outcomes across subjects, demonstrating that parameters from our model reflect purely behavioural characteristics. E) Distributions of estimated parameter values for  $\tau^+$  and  $\tau^-$ , representing

307 update rates following danger and safety outcomes respectively, showing a bias in updating whereby subjects  
 308 update to a greater extent in response to danger than safety.

### 309 Relationships with psychiatric measures

310 First, as a validation of our task, we tested whether task-induced anxiety was predicted by  
 311 state and trait anxiety. Pearson correlations revealed significant relationships with both these  
 312 measures (state  $R=0.25$ ,  $p<.001$ ; trait  $R=0.21$ ,  $p<.001$ ), indicating that individuals reporting  
 313 more general anxiety also found the task more anxiety-inducing.

| Target variable            | Predictor | Estimate (+/- 95% HPDI)  |
|----------------------------|-----------|--------------------------|
| Threat update ( $\tau^-$ ) | IUS       | 0.07 (-0.03, 0.16)       |
|                            | STICSA S  | -0.09 (-0.19, 0.01)      |
|                            | STICSA T  | -0.03 (-0.12, 0.07)      |
| Safety update ( $\tau^+$ ) | IUS       | 0.0 (-0.1, 0.09)         |
|                            | STICSA S  | <b>0.12 (0.02, 0.21)</b> |
|                            | STICSA T  | 0.09 (-0.01, 0.18)       |
| Mean safety uncertainty    | IUS       | -0.05 (-0.14, 0.05)      |
|                            | STICSA S  | -0.09 (-0.19, 0.01)      |
|                            | STICSA T  | -0.08 (-0.18, 0.01)      |
| Mean safety probability    | IUS       | -0.02 (-0.12, 0.07)      |
|                            | STICSA S  | <b>0.12 (0.02, 0.21)</b> |
|                            | STICSA T  | 0.06 (-0.03, 0.15)       |

314 Table 1. Estimates from regression model predicting learning-related variables derived from our computational  
 315 model from measures of intolerance of uncertainty, state anxiety, and trait anxiety. Effects with HPDIs excluding  
 316 zero are highlighted. IUS: Intolerance of uncertainty scale; STICSA S: State-trait inventory of cognitive and somatic  
 317 anxiety, state measure; STICSA T: State-trait inventory of cognitive and somatic anxiety, trait measure; HPDI:  
 318 Highest posterior density estimate

319 We next asked whether our four behavioural variables of interest (threat and danger update  
 320 parameters, mean estimated safety probability, and mean estimated uncertainty) were  
 321 associated with anxiety (both state and trait) and intolerance of uncertainty respectively.  
 322 Contrary to our hypotheses, the only relationships with HPD intervals that did not include zero  
 323 were positive effects of state anxiety on safety update rates and mean estimated safety  
 324 probability (Figure 3E, Table 1), indicating more anxious individuals learned faster about safety  
 325 and perceived safety as more likely overall.

326 We then tested whether behaviour in the task was associated with three transdiagnostic  
 327 factors identified in previous research (6). Here, we observed unexpected relationships with a  
 328 factor labelled compulsivity and intrusive thought (Figure 3F, Table 2), reflecting the fact that  
 329 subjects scoring higher on this factor learned faster about safety and had higher safety  
 330 probability estimates. No other effects had HPDIs that excluded zero.

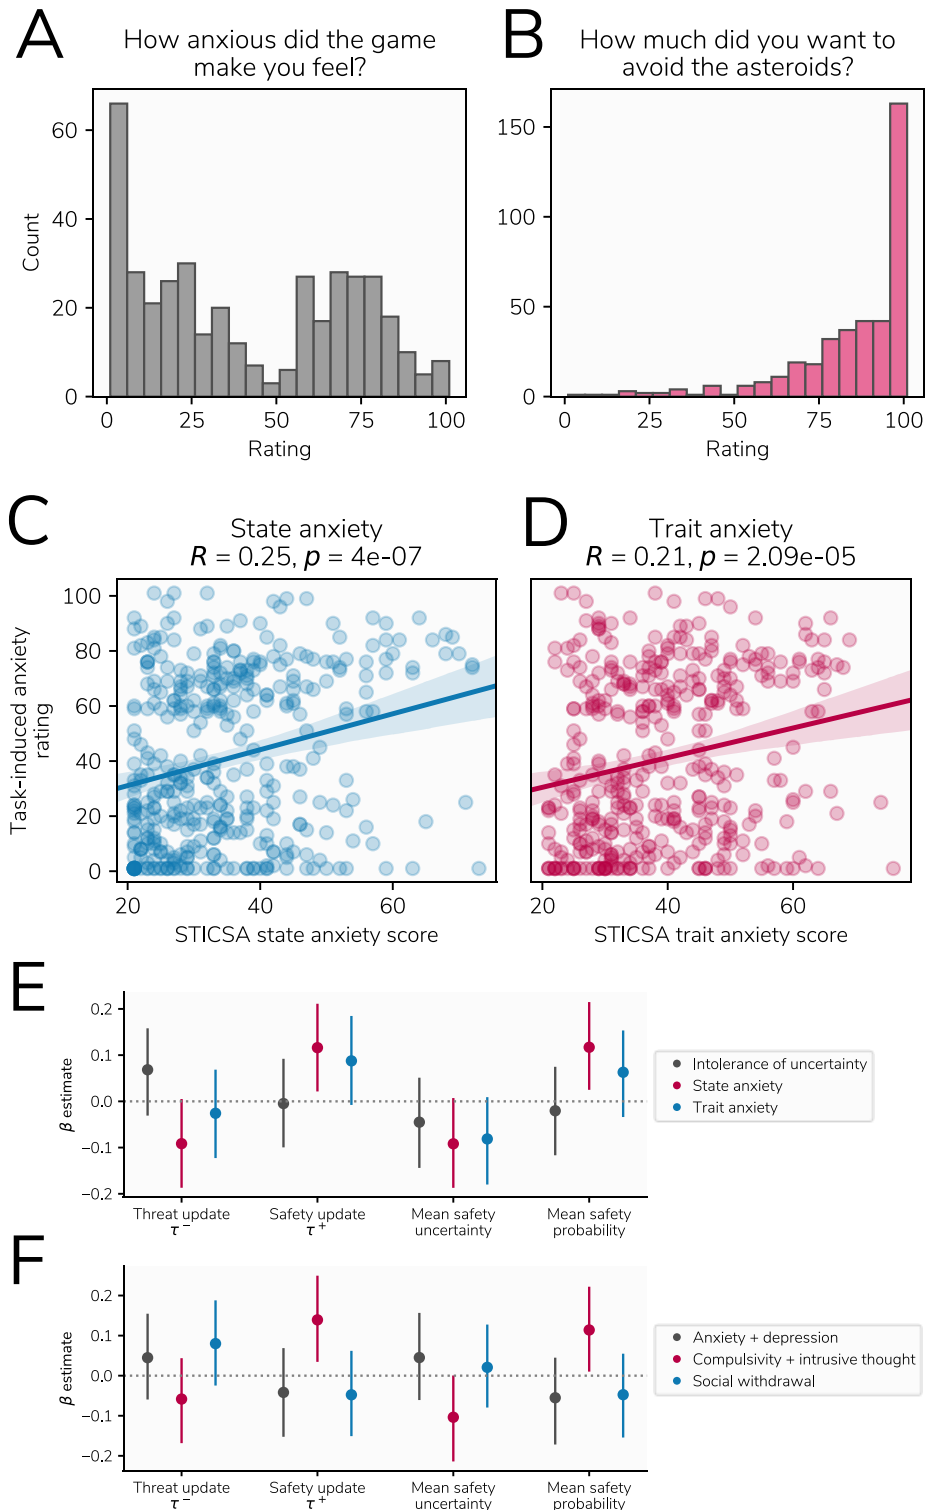

331

332 Figure 3. A) Distribution of task-induced anxiety ratings recorded after the task. B) Distribution of task motivation  
 333 ratings. C and D) Relationships between task-induced anxiety ratings and state and trait anxiety scores. E) Results  
 334 of state/trait anxiety and intolerance of uncertainty models, showing relationships between these psychiatric  
 335 variables and behavioural variables. Points indicate the mean of the posterior distribution for the regression  
 336 coefficient parameter, while error bars represent the 95% highest posterior density interval. The  $\beta$  estimate here  
 337 refers to the regression coefficient for each predictor. F) Results of three factor model, showing relationships  
 338 between behaviour and factors labelled anxiety and depression, compulsivity and intrusive thought, and social  
 339 withdrawal.

| Target variable            | Predictor | Estimate (+/- 95% HPDI)  |
|----------------------------|-----------|--------------------------|
| Threat update ( $\tau^-$ ) | AD        | 0.04 (-0.06, 0.15)       |
|                            | CBIT      | -0.06 (-0.17, 0.04)      |
|                            | SW        | 0.08 (-0.02, 0.19)       |
| Safety update ( $\tau^+$ ) | AD        | -0.04 (-0.15, 0.07)      |
|                            | CBIT      | <b>0.14 (0.03, 0.25)</b> |
|                            | SW        | -0.05 (-0.15, 0.06)      |
| Mean safety uncertainty    | AD        | 0.05 (-0.06, 0.16)       |
|                            | CBIT      | -0.1 (-0.21, 0.0)        |
|                            | SW        | 0.02 (-0.08, 0.13)       |
| Mean safety probability    | AD        | -0.06 (-0.17, 0.04)      |
|                            | CBIT      | <b>0.11 (0.01, 0.22)</b> |
|                            | SW        | -0.05 (-0.15, 0.05)      |

340 Table 2. Estimates from regression model predicting learning-related variables derived from our computational  
 341 model from the three transdiagnostic factors identified by Gillan et al. (2016). Effects with HPDIs excluding zero  
 342 are highlighted. AD: Anxious-depression; CBIT: Compulsive behaviour and intrusive thought; SW: Social  
 343 withdrawal; HPDI: Highest posterior density estimate

344

### 345 Psychiatric constructs derived from behaviour and self-report

346 Finally, we sought to identify factors represented shared covariance between our behavioural  
 347 measures and individual questionnaire items using PLS regression. We first identified the  
 348 number of components that best described our data by evaluating the performance of a  
 349 predictive PLS model using cross-validation. Two components gave the best predictive  
 350 performance (Figure 4A). We then evaluated the performance of this model on held out data  
 351 using permutation testing, and this indicated our model achieved a statistically significant level  
 352 of predictive accuracy (permutation  $p = 0.025$ , Figure 4B).

353 To aid interpretation of these two components we examined how our behavioural variables  
 354 loaded on each. The first component had positive weights on update rates in response to safety  
 355 and estimated safety likelihood, and negative weights on update rates in response to threat,  
 356 decay, stickiness, and mean uncertainty estimates (Figure 4C), while the reverse was true of  
 357 the second component. Loadings on questionnaire items were varied, but the first component  
 358 tended to load most strongly on items describing physical symptoms of anxiety, compulsive  
 359 behaviour, and impulsivity. In contrast, the second factor loaded primary on items describing  
 360 social anxiety and depressed mood. For illustrative purposes, a selection of items showing  
 361 strong differences in loadings between components are shown in Figure 4D, with full details  
 362 available in supplementary material.

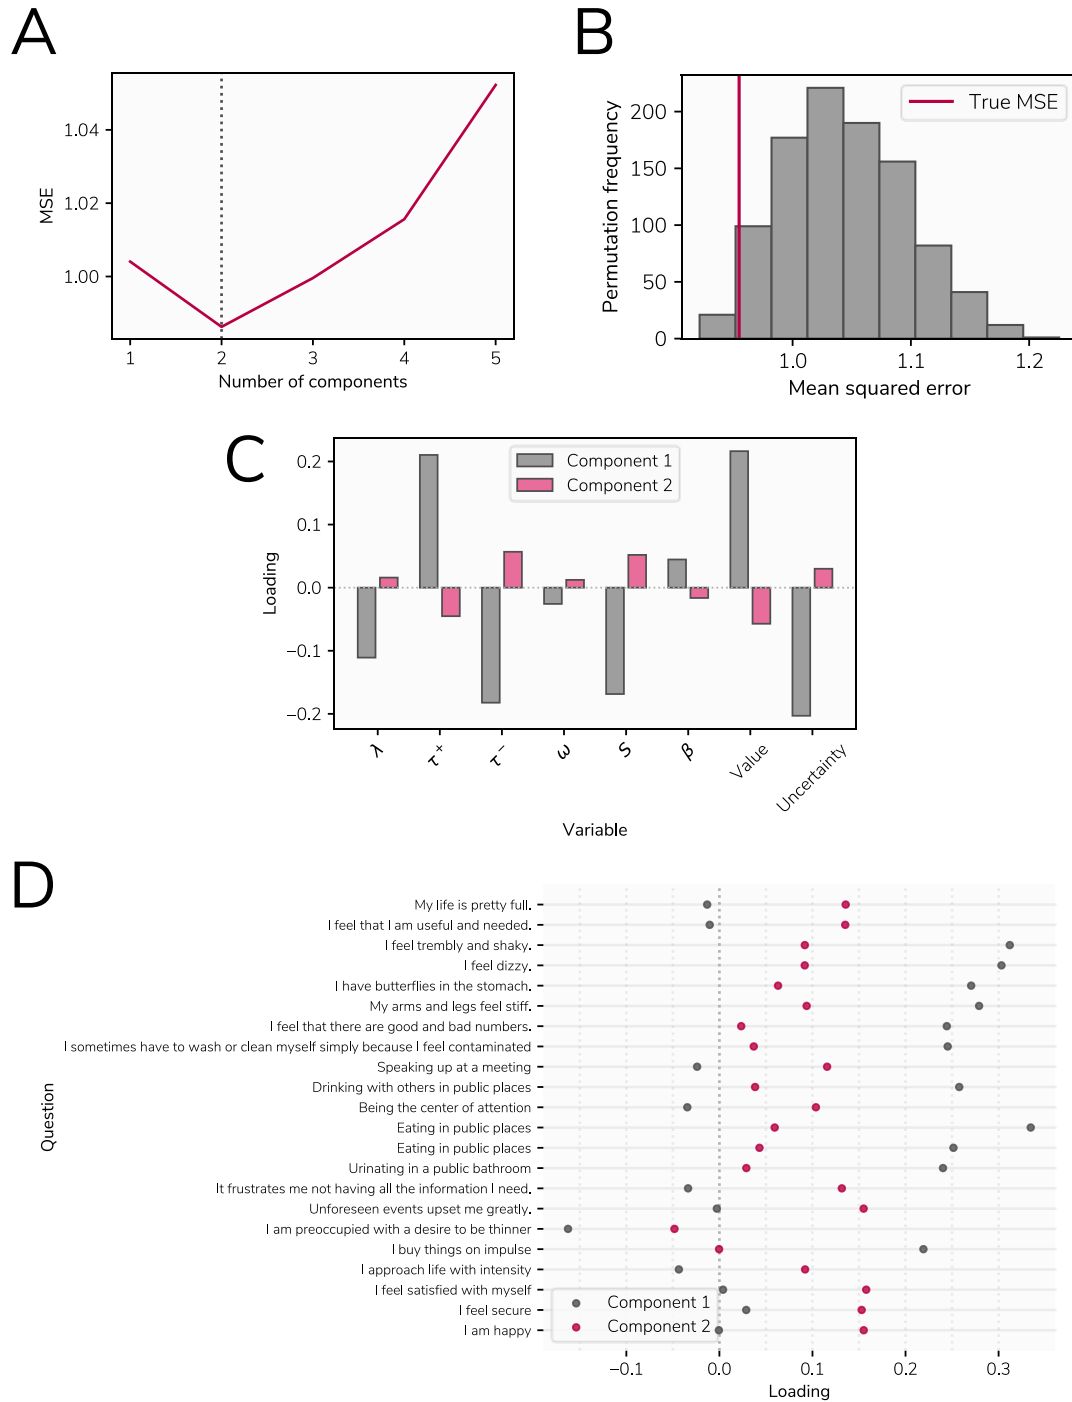

363

364 Figure 4. Results of PLS regression analysis. A) The optimal number of components was determined based on cross-  
 365 validated predictive accuracy within 75% of the data used for training the model. This figure represents the negative  
 366 mean squared error of these predictions across models with between one and five factors, showing best  
 367 performance with 2 components. B) Null distribution of predictive accuracy scores generated by retraining our PLS  
 368 regression model on 1000 permuted datasets and testing on the held out 25% of the data set, with the MSE  
 369 achieved by the model trained on the true data shown by the red line. C) Loadings for the two components on  
 370 behavioural variables, including all parameters in the model and mean safety probably and uncertainty estimates.  
 371 D) Loadings on a selection of questionnaire items showing the largest dissociations in loadings between the two  
 372 components.

## 373 Discussion

374 Perceptions of danger and safety have been linked to key symptoms of psychiatric disorders.  
375 Here, we use computational modelling to show that when subjects learn to avoiding threat,  
376 transdiagnostic components of psychopathology relate to how they learn about both safety  
377 likelihood, and uncertainty.

378 We found an unexpected relationship between biases in learning and anxiety. Contrary to our  
379 a priori hypotheses, subjects scoring higher on state anxiety tended to update their predictions  
380 to a greater extent in response to safety, as well as perceiving safety to be more likely overall,  
381 than those scoring low on this measure. These results diverge from previous findings that  
382 reported individuals diagnosed with clinical anxiety and depression learn faster from  
383 punishment (12). One potential explanation for this discrepancy is that the aforementioned  
384 work included subjects with clinical diagnoses, involving a mix of anxiety and depressive  
385 disorders. When we examined transdiagnostic factors, we found that symptoms of depression  
386 were associated with elevated learning from threat, suggesting that such a bias in learning is  
387 associated with depressive symptoms. It is also possible that the nature of our game-based  
388 online task engaged processes distinct from that of standard lab-based tasks, though it is not  
389 clear what these might be. Nevertheless, we observed a similar pattern of results, where more  
390 anxious subjects learn faster about safety, in a study using a more traditional lab-based  
391 aversive learning task (Wise et al, 2019).

392 We found a similar pattern of enhanced learning from threat when examining a transdiagnostic  
393 factor representing compulsivity and intrusive thought. Although this factor has been shown  
394 to be associated with more model-free behaviour (6, 24), altered confidence judgements (25),  
395 and action-confidence coupling (8) in large-scale samples, to date it has not been investigated  
396 with regard to threat learning. Notably, we found a weak relationship between this factor and  
397 uncertainty, whereby more compulsive individuals had higher certainty in their safety  
398 estimates, echoing previous work in perceptual decision making that showed this factor is  
399 associated with higher confidence estimates (8, 25). We only found weak relationships with  
400 the other two factors, representing anxious-depression and social withdrawal, in a direction  
401 indicative of lower safety probability estimates and higher uncertainty.

402 Perhaps our most striking results come from our data-driven approach where we derived  
403 components of psychopathology grounded in computational analyses of aversive learning  
404 behaviour. Using PLS regression we identified two components, one associating greater  
405 learning from safety with physiological symptoms of anxiety and compulsivity, while the other  
406 associated greater learning from threat with depressive symptoms and social anxiety. These  
407 results suggest that symptoms which are typically grouped together, either within diagnostic  
408 categories or in factors identified using self-report measures alone, are associated with distinct  
409 patterns of learning behaviour. This data-driven analysis also revealed relationships between  
410 aversive learning and impulsive behaviour, encompassing a symptom dimension that is  
411 typically studied in the context of reward processing (34). Individuals scoring higher on these  
412 symptoms exhibited higher safety learning, which may explain previously observed  
413 relationships between impulsivity and risk tolerance (35).

414 A feature of this study is our development of a novel online task for measuring aversive learning.  
415 A number of studies examining other aspects of learning and decision making in the context of  
416 psychiatric disorders have also availed of large samples recruited through online services (6, 8,  
417 24, 25). However, it has been difficult to examine aversive learning in online environments, as  
418 aversive lab stimuli such as shock cannot be easily administered online. A game-based design  
419 allowed us to design a task that required avoidance behaviour as well as evoke feelings of  
420 anxiety. Although qualitatively different from standard lab-based tasks, we observed similar  
421 patterns of biased learning to that seen in lab-based work (36). An added benefit of our task is  
422 that it is highly engaging, and subjects reported feeling motivated to perform well.

423 One potential limitation of this study is a focus on a general population sample. While this might  
424 limit applicability to clinical anxiety, other research indicates that findings from clinical samples  
425 replicate in samples recruited online (6, 8). Furthermore, it seems reasonable to assume that  
426 clinical anxiety is on a spectrum with less severe expressions of this condition. Although we  
427 did not deliberately set out to recruit individuals with clinically significant anxiety, 36% of our  
428 sample scored at or above a threshold designed for the detection of anxiety disorders on our  
429 measure of trait anxiety (see supplementary material). In light of this, and given limitations with  
430 research in clinical samples that includes medication load (37) and recruitment challenges (38),  
431 online samples provide an effective method for studying clinically-relevant phenomena.  
432 Additionally, it is important to note that the effects we observed were small, as in previous  
433 studies using large-scale online testing (6, 24, 24). However, large samples provide accurate  
434 effect size estimates in contrast to the exaggerated effects that are common in studies using  
435 small samples (39). Such small effects are unsurprising given the multifactorial nature of  
436 psychiatric disorders (40). While we have shown aversive learning to be important, we  
437 acknowledge this is likely to be one of a multitude of processes involved in the development of  
438 these conditions.

439 In conclusion, our results demonstrate novel links between transdiagnostic symptoms of  
440 psychiatric disorders and mechanisms of threat learning and uncertainty estimation in  
441 aversive environments. The findings emphasise the importance of these processes not only in  
442 anxiety but indicate a likely relevance across a spectrum of psychopathology.

## 443 Acknowledgements

444 T.W. is supported by a Wellcome Trust Sir Henry Wellcome Fellowship (206460/17/Z). R.J.D.  
445 holds a Wellcome Trust Investigator award (098362/Z/12/Z). The Max Planck UCL Centre is a  
446 joint initiative supported by UCL and the Max Planck Society. The Wellcome Centre for Human  
447 Neuroimaging is supported by core funding from the Wellcome Trust (203147/Z/16/Z). We  
448 thank Evan Russek for comments on an earlier version of this manuscript.

449

450

## 451 References

- 452 1. Reininghaus U, Kempton MJ, Valmaggia L, Craig TKJ, Garety P, Onyejiaka A, et al. (2016):  
453 Stress Sensitivity, Aberrant Salience, and Threat Anticipation in Early Psychosis: An  
454 Experience Sampling Study. *Schizophr Bull.* 42: 712–722.
- 455 2. Harrison A, Tchanturia K, Treasure J (2010): Attentional Bias, Emotion Recognition, and  
456 Emotion Regulation in Anorexia: State or Trait? *Biological Psychiatry, Positron*  
457 *Emission Tomography Imaging of Dopamine and Opiate Receptors in Addiction.* 68:  
458 755–761.
- 459 3. Friston KJ, Stephan KE, Montague R, Dolan RJ (2014): Computational psychiatry: the brain  
460 as a phantastic organ. *The Lancet Psychiatry.* 1: 148–158.
- 461 4. Montague PR, Dolan RJ, Friston KJ, Dayan P (2012): Computational psychiatry. *Trends in*  
462 *Cognitive Sciences, Special Issue: Cognition in Neuropsychiatric Disorders.* 16: 72–80.
- 463 5. Browning M, Behrens TE, Jocham G, O'Reilly JX, Bishop SJ (2015): Anxious individuals  
464 have difficulty learning the causal statistics of aversive environments. *Nat Neurosci.*  
465 18: 590–596.
- 466 6. Gillan CM, Kosinski M, Whelan R, Phelps EA, Daw ND (2016): Characterizing a psychiatric  
467 symptom dimension related to deficits in goal-directed control. *eLife.* 5: e11305.
- 468 7. Huang H, Thompson W, Paulus MP (2017): Computational Dysfunctions in Anxiety:  
469 Failure to Differentiate Signal From Noise. *Biological Psychiatry, Computational*  
470 *Psychiatry.* 82: 440–446.
- 471 8. Seow TX, Gillan C (2019): Transdiagnostic phenotyping reveals a range of metacognitive  
472 deficits associated with compulsivity. *bioRxiv.* 664003.
- 473 9. Lawson RP, Mathys C, Rees G (2017): Adults with autism overestimate the volatility of the  
474 sensory environment. *Nat Neurosci.* advance online publication. doi:  
475 10.1038/nn.4615.
- 476 10. Mkrtchian A, Aylward J, Dayan P, Roiser JP, Robinson OJ (2017): Modeling Avoidance in  
477 Mood and Anxiety Disorders Using Reinforcement Learning. *Biological Psychiatry,*  
478 *Stress: Mechanisms in Gut and Brain.* 82: 532–539.
- 479 11. Vinckier F, Gaillard R, Palminteri S, Rigoux L, Salvador A, Fornito A, et al. (2016):  
480 Confidence and psychosis: a neuro-computational account of contingency learning  
481 disruption by NMDA blockade. *Mol Psychiatry.* 21: 946–955.



- 482 12. Aylward J, Valton V, Ahn W-Y, Bond RL, Dayan P, Roiser JP, Robinson OJ (2019): Altered  
483 learning under uncertainty in unmedicated mood and anxiety disorders. *Nature*  
484 *Human Behaviour*. 1.
- 485 13. Robinson OJ, Chase HW (2017): Learning and Choice in Mood Disorders: Searching for  
486 the Computational Parameters of Anhedonia. *Computational Psychiatry*. 1–26.
- 487 14. Sharp PB, Eldar E (2019): Computational Models of Anxiety: Nascent Efforts and Future  
488 Directions. *Curr Dir Psychol Sci*. 28: 170–176.
- 489 15. Lefebvre G, Lebreton M, Meyniel F, Bourgeois-Gironde S, Palminteri S (2017):  
490 Behavioural and neural characterization of optimistic reinforcement learning. *Nature*  
491 *Human Behaviour*. 1: 0067.
- 492 16. Bach DR, Dolan RJ (2012): Knowing how much you don't know: a neural organization of  
493 uncertainty estimates. *Nat Rev Neurosci*. 13: 572–586.
- 494 17. de Berker AO, Rutledge RB, Mathys C, Marshall L, Cross GF, Dolan RJ, Bestmann S  
495 (2016): Computations of uncertainty mediate acute stress responses in humans. *Nat*  
496 *Commun*. 7: 10996.
- 497 18. Mathys C, Daunizeau J, Friston KJ, Stephan KE (2011): A Bayesian foundation for  
498 individual learning under uncertainty. *Front Hum Neurosci*. 5: 39.
- 499 19. Mathys C, Lomakina EI, Daunizeau J, Iglesias S, Brodersen KH, Friston KJ, Stephan KE  
500 (2014): Uncertainty in perception and the Hierarchical Gaussian Filter. *Front Hum*  
501 *Neurosci*. 8: 825.
- 502 20. Grupe DW, Nitschke JB (2013): Uncertainty and anticipation in anxiety: an integrated  
503 neurobiological and psychological perspective. *Nat Rev Neurosci*. 14: 488–501.
- 504 21. Dugas MJ, Gagnon F, Ladouceur R, Freeston MH (1998): Generalized anxiety disorder: a  
505 preliminary test of a conceptual model. *Behaviour Research and Therapy*. 36: 215–  
506 226.
- 507 22. Barlow DH (2000): Unraveling the mysteries of anxiety and its disorders from the  
508 perspective of emotion theory. *Am Psychol*. 55: 1247–1263.
- 509 23. Grillon C (2002): Associative learning deficits increase symptoms of anxiety in humans.  
510 *Biological Psychiatry*. 51: 851–858.

- 511 24. Patzelt EH, Kool W, Millner AJ, Gershman SJ (2018): Incentives Boost Model-Based  
512 Control Across a Range of Severity on Several Psychiatric Constructs. *Biological*  
513 *Psychiatry*. doi: 10.1016/j.biopsych.2018.06.018.
- 514 25. Rouault M, Seow T, Gillan CM, Fleming SM (2018): Psychiatric Symptom Dimensions Are  
515 Associated With Dissociable Shifts in Metacognition but Not Task Performance.  
516 *Biological Psychiatry, Translating Biology to Treatment in Schizophrenia*. 84: 443–  
517 451.
- 518 26. Palan S, Schitter C (2018): Prolific.ac—A subject pool for online experiments. *Journal of*  
519 *Behavioral and Experimental Finance*. 17: 22–27.
- 520 27. de Boer L, Axelsson J, Riklund K, Nyberg L, Dayan P, Bäckman L, Guitart-Masip M (2017):  
521 Attenuation of dopamine-modulated prefrontal value signals underlies probabilistic  
522 reward learning deficits in old age. (W. Schultz, editor) *eLife*. 6: e26424.
- 523 28. Tzovara A, Korn CW, Bach DR (2018): Human Pavlovian fear conditioning conforms to  
524 probabilistic learning. *PLOS Computational Biology*. 14: e1006243.
- 525 29. Wise T, Michely J, Dayan P, Dolan RJ (2019): A computational account of threat-related  
526 attentional bias. *PLOS Computational Biology*. 15: e1007341.
- 527 30. Watanabe S (2010): Asymptotic Equivalence of Bayes Cross Validation and Widely  
528 Applicable Information Criterion in Singular Learning Theory. *J Mach Learn Res*. 11:  
529 3571–3594.
- 530 31. Grös DF, Antony MM, Simms LJ, McCabe RE (2007): Psychometric properties of the  
531 State-Trait Inventory for Cognitive and Somatic Anxiety (STICSA): comparison to the  
532 State-Trait Anxiety Inventory (STAI). *Psychol Assess*. 19: 369–381.
- 533 32. Carleton RN, Norton MAPJ, Asmundson GJG (2007): Fearing the unknown: A short  
534 version of the Intolerance of Uncertainty Scale. *Journal of Anxiety Disorders*. 21: 105–  
535 117.
- 536 33. Yarkoni T, Westfall J (2016): Bambi: A simple interface for fitting Bayesian mixed effects  
537 models. doi: 10.31219/osf.io/rv7sn.
- 538 34. Plichta MM, Scheres A (2014): Ventral–striatal responsiveness during reward anticipation  
539 in ADHD and its relation to trait impulsivity in the healthy population: A meta-analytic  
540 review of the fMRI literature. *Neuroscience & Biobehavioral Reviews*. 38: 125–134.

- 541 35. Deakin J, Aitken M, Robbins T, Sahakian BJ (2004): Risk taking during decision-making in  
542 normal volunteers changes with age. *Journal of the International Neuropsychological*  
543 *Society*. 10: 590–598.
- 544 36. Wise T, Michely J, Dayan P, Dolan RJ (2019): A computational account of threat-related  
545 attentional bias.
- 546 37. Phillips ML, Travis MJ, Fagiolini A, Kupfer DJ (2008): Medication Effects in Neuroimaging  
547 Studies of Bipolar Disorder. *American Journal of Psychiatry*. 165: 313–320.
- 548 38. Wise T, Arnone D, Marwood L, Zahn R, Lythe KE, Young AH (2016): Recruiting for  
549 research studies using online public advertisements: examples from research in  
550 affective disorders. *Neuropsychiatr Dis Treat*. 12: 279–285.
- 551 39. Gelman A, Carlin J (2014): Beyond Power Calculations: Assessing Type S (Sign) and Type  
552 M (Magnitude) Errors. *Perspect Psychol Sci*. 9: 641–651.
- 553 40. Kendler KS (2019): From Many to One to Many—the Search for Causes of Psychiatric  
554 Illness. *JAMA Psychiatry*. 76: 1085–1091.
- 555
